# Supplementary material
Source: PubMed Central journal article supplement (PMC9846386)
Supplement: sj-pdf-1-dst-10.1177_19322968211033868.pdf [file sj-pdf-1-dst-10.1177_19322968211033868.pdf]

## SUPPLEMENTAL DATA

| Cell Type      |           | Murine         |                   |                  |
|----------------|-----------|----------------|-------------------|------------------|
|                |           | RAW Macrophage | 3T3-L1 Fibroblast | 3T3-L1 Fact Cell |
| Dilution Ratio | Treatment |                |                   |                  |
| 1:3            | DF vs. S  | <0.0001        | <0.0001           | <0.0001          |
|                | SF vs. S  | <0.0001        | 0.0003            | <0.0001          |
|                | SF vs. DF | <0.0001        | <0.0001           | <0.0001          |
|                | D vs. S   | <0.0001        | <0.0001           | <0.0001          |
|                | D vs. DF  | 0.0004         | 0.0043            | NS               |
|                | D vs. SF  | <0.0001        | <0.0001           | <0.0001          |
| 1:6            | DF vs. S  | <0.0001        | <0.0001           | <0.0001          |
|                | SF vs. S  | <0.0001        | <0.0001           | <0.0001          |
|                | SF vs. DF | <0.0001        | <0.0001           | <0.0001          |
|                | D vs. S   | <0.0001        | <0.0001           | <0.0001          |
|                | D vs. DF  | <0.0001        | <0.0001           | 0.0264           |
|                | D vs. SF  | 0.0192         | <0.0001           | <0.0001          |
| 1:12           | DF vs. S  | <0.0001        | NS                | <0.0001          |
|                | SF vs. S  | <0.0001        | <0.0001           | <0.0001          |
|                | SF vs. DF | <0.0001        | <0.0001           | 0.0049           |
|                | D vs. S   | 0.0115         | <0.0001           | <0.0001          |
|                | D vs. DF  | <0.0001        | <0.0001           | NS               |
|                | D vs. SF  | <0.0001        | <0.0001           | 0.0264           |
| 1:24           | DF vs. S  | <0.0001        | <0.0001           | NS               |
|                | SF vs. S  | <0.0001        | <0.0001           | <0.0001          |
|                | SF vs. DF | <0.0001        | <0.0001           | <0.0001          |
|                | D vs. S   | <0.0001        | 0.0118            | <0.0001          |
|                | D vs. DF  | <0.0001        | 0.0002            | <0.0001          |
|                | D vs. SF  | <0.0001        | <0.0001           | 0.0002           |
| 1:48           | DF vs. S  | <0.0001        | <0.0001           | NS               |
|                | SF vs. S  | NS             | <0.0001           | <0.0001          |
|                | SF vs. DF | <0.0001        | <0.0001           | 0.0117           |
|                | D vs. S   | <0.0001        | NS                | NS               |
|                | D vs. DF  | <0.0001        | <0.0001           | NS               |

|       |           |         |         |         |
|-------|-----------|---------|---------|---------|
|       | D vs. SF  | <0.0001 | <0.0001 | 0.0264  |
| 1:96  | DF vs. S  | NS      | <0.0001 | <0.0001 |
|       | SF vs. S  | <0.0001 | <0.0001 | <0.0001 |
|       | SF vs. DF | <0.0001 | 0.0008  | <0.0001 |
|       | D vs. S   | <0.0001 | <0.0001 | 0.0019  |
|       | D vs. DF  | <0.0001 | 0.0012  | <0.0001 |
|       | D vs. SF  | <0.0001 | NS      | <0.0001 |
| 1:192 | DF vs. S  | NS      | <0.0001 | 0.0117  |
|       | SF vs. S  | <0.0001 | <0.0001 | <0.0001 |
|       | SF vs. DF | <0.0001 | NS      | <0.0001 |
|       | D vs. S   | <0.0001 | NS      | <0.0001 |
|       | D vs. DF  | <0.0001 | <0.0001 | <0.0001 |
|       | D vs. SF  | <0.0001 | <0.0001 | NS      |

**Table S1. Statistical Analysis of in vitro cell viability data for saline, diluent, saline fibril and diluent. ANOVA p-values for dose dependent addition of S (saline), SF (saline fibril), D (diluent), DF (diluent fibril) for murine and human cell lines. NS denotes not significant.**

| <b>TOTAL CELL (related to Figure 3A)</b>                        |           |                                                       |                                           |                  |                   |                   |
|-----------------------------------------------------------------|-----------|-------------------------------------------------------|-------------------------------------------|------------------|-------------------|-------------------|
| <b>Exploratory pairwise comparisons using ANOVA</b>             |           |                                                       |                                           |                  |                   |                   |
|                                                                 |           | <b>Post hoc multiple comparisons (Tukey adjusted)</b> |                                           |                  |                   |                   |
|                                                                 |           | <b>P value of ANOVA (S vs. SF vs. D vs. DF)</b>       | <b>S. vs D</b>                            | <b>SF vs. DF</b> | <b>S vs. SF</b>   | <b>D vs. DF</b>   |
| <b>Non-diabetic</b>                                             | <b>3d</b> | <b>&lt;0.0001</b>                                     | <b>n.s.</b>                               | <b>&lt;0.001</b> | <b>&lt;0.0001</b> | <b>&lt;0.0001</b> |
| <b>Non-diabetic</b>                                             | <b>7d</b> | <b>&lt;0.0001</b>                                     | <b>&lt;0.05</b>                           | <b>&lt;0.001</b> | <b>&lt;0.001</b>  | <b>&lt;0.0001</b> |
| <b>Diabetic</b>                                                 | <b>3d</b> | <b>&lt;0.0001</b>                                     | <b>&lt;0.05</b>                           | <b>&lt;0.05</b>  | <b>&lt;0.0001</b> | <b>&lt;0.0001</b> |
| <b>Diabetic</b>                                                 | <b>7d</b> | <b>&lt;0.0001</b>                                     | <b>n.s.</b>                               | <b>&lt;0.05</b>  | <b>&lt;0.0001</b> | <b>&lt;0.0001</b> |
| <b>Exploratory pairwise comparisons using two-sample t-test</b> |           |                                                       |                                           |                  |                   |                   |
| <b>P value (3 day vs 7 day)</b>                                 |           |                                                       | <b>P value (Non-diabetic vs Diabetic)</b> |                  |                   |                   |
| <b>Non-diabetic</b>                                             | <b>S</b>  | <b>n.s.</b>                                           | <b>S</b>                                  | <b>3d</b>        | <b>&lt;0.001</b>  |                   |
| <b>Non-diabetic</b>                                             | <b>SF</b> | <b>n.s.</b>                                           | <b>S</b>                                  | <b>7d</b>        | <b>&lt;0.0001</b> |                   |
| <b>Non-diabetic</b>                                             | <b>D</b>  | <b>&lt;0.02</b>                                       | <b>SF</b>                                 | <b>3d</b>        | <b>&lt;0.0001</b> |                   |
| <b>Non-diabetic</b>                                             | <b>DF</b> | <b>n.s.</b>                                           | <b>SF</b>                                 | <b>7d</b>        | <b>&lt;0.001</b>  |                   |
| <b>Diabetic</b>                                                 | <b>S</b>  | <b>&lt;0.05</b>                                       | <b>D</b>                                  | <b>3d</b>        | <b>&lt;0.0001</b> |                   |
| <b>Diabetic</b>                                                 | <b>SF</b> | <b>n.s.</b>                                           | <b>D</b>                                  | <b>7d</b>        | <b>&lt;0.002</b>  |                   |
| <b>Diabetic</b>                                                 | <b>D</b>  | <b>n.s.</b>                                           | <b>DF</b>                                 | <b>3d</b>        | <b>&lt;0.0001</b> |                   |
| <b>Diabetic</b>                                                 | <b>DF</b> | <b>n.s.</b>                                           | <b>DF</b>                                 | <b>7d</b>        | <b>&lt;0.002</b>  |                   |

**Table S2. Statistical Analysis of Total Cell number (leukocytes) recruitment data for fibril and phenolic diluent injections into mouse air pouch model (related to Figure 3A).** Leukocyte recruitment was determined following injection of saline (S), diluent (D), and saline + fibril (SF), diluent + fibril (DF) for 3-days (3D) and 7-days (7D) in non-diabetic and diabetic mice. Exploratory ANOVA p-values for injection of S, SF, D, DF for non-diabetic and diabetic mice, 3 day and 7 day and Exploratory pairwise comparison using two-sample t-test p-values for 3D versus 7D injection and non-diabetic vs diabetic injection of S, SF, D, DF.

| <b>NEUTROPHILS (related to <i>Figure 3B</i>)</b>                |           |                  |                                                           |                       |                      |                      |
|-----------------------------------------------------------------|-----------|------------------|-----------------------------------------------------------|-----------------------|----------------------|----------------------|
| <b>Exploratory pairwise comparisons using ANOVA</b>             |           |                  |                                                           |                       |                      |                      |
| <b>P value of ANOVA<br/>( S vs SF vs D vs DF)</b>               |           |                  | <b>Post hoc multiple comparisons<br/>(Tukey adjusted)</b> |                       |                      |                      |
|                                                                 |           |                  | <b>S. vs D.</b>                                           | <b>SF. vs<br/>DF.</b> | <b>S. vs<br/>SF.</b> | <b>D. vs<br/>DF.</b> |
| <b>Non-diabetic</b>                                             | <b>3d</b> | <b>&lt;0.001</b> | <b>n.s.</b>                                               | <b>&lt;0.001</b>      | <b>n.s.</b>          | <b>&lt;0.001</b>     |
| <b>Non-diabetic</b>                                             | <b>7d</b> | <b>&lt;0.001</b> | <b>n.s.</b>                                               | <b>n.s.</b>           | <b>&lt;0.05</b>      | <b>&lt;0.05</b>      |
| <b>Diabetic</b>                                                 | <b>3d</b> | <b>&lt;0.001</b> | <b>n.s.</b>                                               | <b>n.s.</b>           | <b>&lt;0.001</b>     | <b>n.s.</b>          |
| <b>Diabetic</b>                                                 | <b>7d</b> | <b>&lt;0.001</b> | <b>n.s.</b>                                               | <b>&lt;0.005</b>      | <b>n.s.</b>          | <b>&lt;0.001</b>     |
| <b>Exploratory pairwise comparisons using two-sample t-test</b> |           |                  |                                                           |                       |                      |                      |
| <b>P value (3 day vs 7 day)</b>                                 |           |                  | <b>P value (Non-diabetic vs Diabetic)</b>                 |                       |                      |                      |
| <b>Non-diabetic</b>                                             | <b>S</b>  | <b>n.s.</b>      | <b>S</b>                                                  | <b>3d</b>             | <b>n.s.</b>          |                      |
| <b>Non-diabetic</b>                                             | <b>SF</b> | <b>n.s.</b>      | <b>S</b>                                                  | <b>7d</b>             | <b>&lt;0.05</b>      |                      |
| <b>Non-diabetic</b>                                             | <b>D</b>  | <b>&lt;0.001</b> | <b>SF</b>                                                 | <b>3d</b>             | <b>n.s.</b>          |                      |
| <b>Non-diabetic</b>                                             | <b>DF</b> | <b>n.s.</b>      | <b>SF</b>                                                 | <b>7d</b>             | <b>n.s.</b>          |                      |
| <b>Diabetic</b>                                                 | <b>S</b>  | <b>&lt;0.01</b>  | <b>D</b>                                                  | <b>3d</b>             | <b>n.s.</b>          |                      |
| <b>Diabetic</b>                                                 | <b>SF</b> | <b>n.s.</b>      | <b>D</b>                                                  | <b>7d</b>             | <b>&lt;0.05</b>      |                      |
| <b>Diabetic</b>                                                 | <b>D</b>  | <b>n.s.</b>      | <b>DF</b>                                                 | <b>3d</b>             | <b>n.s.</b>          |                      |
| <b>Diabetic</b>                                                 | <b>DF</b> | <b>&lt;0.01</b>  | <b>DF</b>                                                 | <b>7d</b>             | <b>n.s.</b>          |                      |

**Table S3. Statistical Analysis of neutrophil recruitment data for fibril and phenolic diluent injections into mouse air pouch model (related to *Figure 3B*).** Neutrophil recruitment was determined following injection of saline (S), diluent (D), and saline fibril (SF), diluent fibril (DF) for 3-days (3D) and 7-days (7D) in non-diabetic and diabetic mice. Exploratory ANOVA p-values for injection of S, SF, D, DF for non-diabetic and diabetic mice, 3 day and 7 day and Exploratory pairwise comparison using two-sample t-test p-values for 3D versus 7D injection and non-diabetic vs diabetic injection of S, SF, D, DF.

| <b>MONOCYTES/MACROPHAGES (related to <i>Figure 3C</i>)</b>      |           |                  |                                                           |                      |                     |                  |
|-----------------------------------------------------------------|-----------|------------------|-----------------------------------------------------------|----------------------|---------------------|------------------|
| <b>Exploratory pairwise comparisons using ANOVA</b>             |           |                  |                                                           |                      |                     |                  |
| <b>P value of ANOVA<br/>( S vs SF vs D vs DF)</b>               |           |                  | <b>Post hoc multiple comparisons<br/>(Tukey adjusted)</b> |                      |                     |                  |
|                                                                 |           |                  | <b>S vs. D</b>                                            | <b>SF vs.<br/>DF</b> | <b>S vs.<br/>SF</b> | <b>D vs. DF</b>  |
| <b>Non-diabetic</b>                                             | <b>3d</b> | <b>&lt;0.001</b> | n.s.                                                      | n.s.                 | <b>&lt;.001</b>     | <b>&lt;.001</b>  |
| <b>Non-diabetic</b>                                             | <b>7d</b> | <b>&lt;0.001</b> | <b>&lt;0.01</b>                                           | <b>&lt;0.001</b>     | <b>&lt;0.01</b>     | <b>&lt;0.001</b> |
| <b>Diabetic</b>                                                 | <b>3d</b> | <b>&lt;0.001</b> | n.s.                                                      | <b>&lt;0.01</b>      | <b>&lt;0.001</b>    | <b>&lt;0.001</b> |
| <b>Diabetic</b>                                                 | <b>7d</b> | <b>&lt;0.001</b> | n.s.                                                      | n.s.                 | <b>&lt;0.001</b>    | <b>&lt;0.001</b> |
| <b>Exploratory pairwise comparisons using two-sample t-test</b> |           |                  |                                                           |                      |                     |                  |
| <b>P value (3 day vs 7 day)</b>                                 |           |                  | <b>P value (Non-diabetic vs Diabetic)</b>                 |                      |                     |                  |
| <b>Non-diabetic</b>                                             | <b>S</b>  | n.s.             | <b>S</b>                                                  | <b>3d</b>            | <b>&lt;0.001</b>    |                  |
| <b>Non-diabetic</b>                                             | <b>SF</b> | <b>&lt;0.01</b>  | <b>S</b>                                                  | <b>7d</b>            | <b>&lt;0.001</b>    |                  |
| <b>Non-diabetic</b>                                             | <b>D</b>  | n.s.             | <b>SF</b>                                                 | <b>3d</b>            | <b>&lt;0.05</b>     |                  |
| <b>Non-diabetic</b>                                             | <b>DF</b> | n.s.             | <b>SF</b>                                                 | <b>7d</b>            | <b>&lt;0.001</b>    |                  |
| <b>Diabetic</b>                                                 | <b>S</b>  | n.s.             | <b>D</b>                                                  | <b>3d</b>            | <b>&lt;0.002</b>    |                  |
| <b>Diabetic</b>                                                 | <b>SF</b> | n.s.             | <b>D</b>                                                  | <b>7d</b>            | <b>&lt;0.05</b>     |                  |
| <b>Diabetic</b>                                                 | <b>D</b>  | <b>&lt;0.05</b>  | <b>DF</b>                                                 | <b>3d</b>            | <b>&lt;0.001</b>    |                  |
| <b>Diabetic</b>                                                 | <b>DF</b> | <b>&lt;0.01</b>  | <b>DF</b>                                                 | <b>7d</b>            | <b>&lt;0.05</b>     |                  |

**Table S4 Statistical Analysis of monocyte/macrophage recruitment data for fibril and phenolic diluent injections into mouse air pouch model (related to *Figure 3C*)** Macrophage and monocyte recruitment were determined following injection of saline (S), diluent (D), and saline fibril (SF), diluent fibril (DF) for 3-days (3D) and 7-days (7D) in non-diabetic and diabetic mice. Exploratory ANOVA p-values for injection of S, SF, D, DF for non-diabetic and diabetic mice, 3 day and 7 day and Exploratory pairwise comparison using two-sample t-test p-values for 3D versus 7D injection and non-diabetic vs diabetic injection of S, SF, D, DF.

| <b>LYMPHOCYTES (related to <i>Figure 3D</i>)</b>                |           |                  |                                                           |                      |                     |                  |
|-----------------------------------------------------------------|-----------|------------------|-----------------------------------------------------------|----------------------|---------------------|------------------|
| <b>Exploratory pairwise comparisons using ANOVA</b>             |           |                  |                                                           |                      |                     |                  |
| <b>P value of ANOVA<br/>( S vs. SF vs. D vs. DF)</b>            |           |                  | <b>Post hoc multiple comparisons<br/>(Tukey adjusted)</b> |                      |                     |                  |
|                                                                 |           |                  | <b>S vs. D</b>                                            | <b>SF vs.<br/>DF</b> | <b>S vs.<br/>SF</b> | <b>D vs. DF</b>  |
| <b>Non-diabetic</b>                                             | <b>3d</b> | <b>&lt;0.001</b> | <b>n.s.</b>                                               | <b>&lt;0.001</b>     | <b>n.s.</b>         | <b>&lt;0.001</b> |
| <b>Non-diabetic</b>                                             | <b>7d</b> | <b>&lt;0.05</b>  | <b>n.s.</b>                                               | <b>&lt;0.002</b>     | <b>n.s.</b>         | <b>&lt;0.005</b> |
| <b>Diabetic</b>                                                 | <b>3d</b> | <b>&lt;0.05</b>  | <b>n.s.</b>                                               | <b>n.s.</b>          | <b>n.s.</b>         | <b>&lt;0.05</b>  |
| <b>Diabetic</b>                                                 | <b>7d</b> | <b>&lt;0.02</b>  | <b>n.s.</b>                                               | <b>&lt;0.05</b>      | <b>&lt;0.05</b>     | <b>n.s.</b>      |
| <b>Exploratory pairwise comparisons using two-sample t-test</b> |           |                  |                                                           |                      |                     |                  |
| <b>P value (3 day vs. 7 day)</b>                                |           |                  | <b>P value (Non-diabetic vs Diabetic)</b>                 |                      |                     |                  |
| <b>Non-diabetic</b>                                             | <b>S</b>  | <b>n.s.</b>      | <b>S</b>                                                  | <b>3d</b>            | <b>n.s.</b>         |                  |
| <b>Non-diabetic</b>                                             | <b>SF</b> | <b>n.s.</b>      | <b>S</b>                                                  | <b>7d</b>            | <b>n.s.</b>         |                  |
| <b>Non-diabetic</b>                                             | <b>D</b>  | <b>n.s.</b>      | <b>SF</b>                                                 | <b>3d</b>            | <b>n.s.</b>         |                  |
| <b>Non-diabetic</b>                                             | <b>DF</b> | <b>n.s.</b>      | <b>SF</b>                                                 | <b>7d</b>            | <b>&lt;0.05</b>     |                  |
| <b>Diabetic</b>                                                 | <b>S</b>  | <b>n.s.</b>      | <b>D</b>                                                  | <b>3d</b>            | <b>n.s.</b>         |                  |
| <b>Diabetic</b>                                                 | <b>SF</b> | <b>n.s.</b>      | <b>D</b>                                                  | <b>7d</b>            | <b>n.s.</b>         |                  |
| <b>Diabetic</b>                                                 | <b>D</b>  | <b>&lt;0.05</b>  | <b>DF</b>                                                 | <b>3d</b>            | <b>&lt;0.001</b>    |                  |
| <b>Diabetic</b>                                                 | <b>DF</b> | <b>n.s.</b>      | <b>DF</b>                                                 | <b>7d</b>            | <b>n.s.</b>         |                  |

**Table S5 Statistical Analysis of lymphocyte recruitment data for fibril and phenolic diluent injections into mouse air pouch model (related to *Figure 3D*).** Lymphocyte recruitment into the AIR POUCH was determined following injection of saline (S), diluent (D), and saline fibril (SF), diluent fibril (DF) for 3-days (3D) and 7-days (7D) in non-diabetic and diabetic mice. Exploratory ANOVA p-values for injection of S, SF, D, DF for non-diabetic and diabetic mice, 3 day and 7 day and Exploratory pairwise comparison using two-sample t-test p-values for 3D versus 7D injection and non-diabetic vs diabetic injection of S, SF, D, DF.

| <b>Total Cell (x1,000) (related to <i>Figures 2 and Table 1</i>)</b> |           |              |             |           |              |             |           |
|----------------------------------------------------------------------|-----------|--------------|-------------|-----------|--------------|-------------|-----------|
| <b>Mouse Status</b>                                                  |           | <b>3 DAY</b> |             |           | <b>7 DAY</b> |             |           |
|                                                                      |           | <b>N</b>     | <b>Mean</b> | <b>SD</b> | <b>N</b>     | <b>Mean</b> | <b>SD</b> |
| <b>Non-diabetic</b>                                                  | <b>S</b>  | 7            | 126         | 27        | 6            | 148         | 61        |
|                                                                      | <b>SF</b> | 8            | 1233        | 483       | 6            | 1092        | 364       |
|                                                                      | <b>D</b>  | 8            | 549         | 222       | 5            | 991         | 321       |
|                                                                      | <b>DF</b> | 8            | 2007        | 375       | 6            | 2183        | 468       |
| <b>Diabetic</b>                                                      | <b>S</b>  | 7            | 438         | 127       | 6            | 690         | 152       |
|                                                                      | <b>SF</b> | 6            | 3590        | 827       | 6            | 2775        | 562       |
|                                                                      | <b>D</b>  | 6            | 1710        | 482       | 6            | 1529        | 140       |
|                                                                      | <b>DF</b> | 9            | 4788        | 1016      | 7            | 3963        | 844       |

**Table S6. Raw data for Total Cells from mouse air pouch model for following injection of phenolic compounds and insulin fibrils in non-diabetic and diabetic mice. Presented in **Table S1** is the raw data used for **Figure 3**. MAP treatments include: saline (S), diluent (D), saline + fibril (SF), and diluent + fibril (DF) for 3-days (3D) and 7-days (7D) in non-diabetic and diabetic mice.**

| <b>Neutrophils (x1,000) (related to <i>Figures 3 and Table 2</i>)</b> |           |              |             |           |              |             |           |
|-----------------------------------------------------------------------|-----------|--------------|-------------|-----------|--------------|-------------|-----------|
| <b>Mouse Status</b>                                                   |           | <b>3 DAY</b> |             |           | <b>7 DAY</b> |             |           |
|                                                                       |           | <b>N</b>     | <b>Mean</b> | <b>SD</b> | <b>N</b>     | <b>Mean</b> | <b>SD</b> |
| <b>Non-diabetic</b>                                                   | <b>S</b>  | 7            | 38          | 15        | 6            | 60          | 29        |
|                                                                       | <b>SF</b> | 8            | 350         | 206       | 6            | 545         | 321       |
|                                                                       | <b>D</b>  | 8            | 146         | 102       | 5            | 374         | 65        |
|                                                                       | <b>DF</b> | 8            | 870         | 387       | 6            | 890         | 407       |
| <b>Diabetic</b>                                                       | <b>S</b>  | 7            | 39          | 23        | 6            | 160         | 76        |
|                                                                       | <b>SF</b> | 6            | 1003        | 668       | 6            | 658         | 191       |
|                                                                       | <b>D</b>  | 6            | 144         | 27        | 6            | 234         | 122       |
|                                                                       | <b>DF</b> | 9            | 649         | 343       | 7            | 1435        | 629       |

**Table S7. Raw data for Neutrophils from mouse air pouch model for following injection of phenolic compounds and insulin fibrils in non-diabetic and diabetic mice.** Presented here is the raw data used for **Figure 3B**. MAP treatments include: saline (S), diluent (D), saline + fibril (SF), and diluent + fibril (DF) for 3-days (3D) and 7-days (7D) in non-diabetic and diabetic mice.

| <b>Monocyte/Macrophage Cell (x1,000) (related to <i>Figures 3 and Table 3</i>)</b> |           |              |             |           |              |             |           |
|------------------------------------------------------------------------------------|-----------|--------------|-------------|-----------|--------------|-------------|-----------|
| <b>Mouse Status</b>                                                                |           | <b>3 DAY</b> |             |           | <b>7 DAY</b> |             |           |
|                                                                                    |           | <b>N</b>     | <b>Mean</b> | <b>SD</b> | <b>N</b>     | <b>Mean</b> | <b>SD</b> |
| <b>Non-diabetic</b>                                                                | <b>S</b>  | 7            | 77          | 13        | 6            | 76          | 29        |
|                                                                                    | <b>SF</b> | 8            | 802         | 280       | 6            | 453         | 65        |
|                                                                                    | <b>D</b>  | 8            | 353         | 137       | 5            | 476         | 202       |
|                                                                                    | <b>DF</b> | 8            | 1007        | 351       | 6            | 1133        | 283       |
| <b>Diabetic</b>                                                                    | <b>S</b>  | 7            | 359         | 103       | 6            | 454         | 96        |
|                                                                                    | <b>SF</b> | 6            | 2353        | 1015      | 6            | 1869        | 375       |
|                                                                                    | <b>D</b>  | 6            | 1378        | 421       | 6            | 728         | 91        |
|                                                                                    | <b>DF</b> | 9            | 3778        | 845       | 7            | 2202        | 790       |

**Table S8. Raw data for Monocytes/Macrophages from mouse air pouch model for following injection of phenolic compounds and insulin fibrils in non-diabetic and diabetic mice.** Presented here is the raw data used for **Figure 3C**. MAP treatments include: saline (S), diluent (D), saline + fibril (SF), and diluent + fibril (DF) for 3-days (3D) and 7-days (7D) in non-diabetic and diabetic mice.

| <b>Lymphocytes (x1,000) (related to <i>Figures 3 and Table 4</i>)</b> |           |              |             |           |              |             |           |
|-----------------------------------------------------------------------|-----------|--------------|-------------|-----------|--------------|-------------|-----------|
| <b>Mouse Status</b>                                                   |           | <b>3 DAY</b> |             |           | <b>7 DAY</b> |             |           |
|                                                                       |           | <b>N</b>     | <b>Mean</b> | <b>SD</b> | <b>N</b>     | <b>Mean</b> | <b>SD</b> |
| <b>Non-diabetic</b>                                                   | <b>S</b>  | 7            | 7           | 7         | 6            | 6           | 5         |
|                                                                       | <b>SF</b> | 8            | 42          | 13        | 6            | 47          | 25        |
|                                                                       | <b>D</b>  | 8            | 33          | 17        | 5            | 79          | 64        |
|                                                                       | <b>DF</b> | 8            | 827         | 262       | 6            | 539         | 448       |
| <b>Diabetic</b>                                                       | <b>S</b>  | 7            | 6           | 2         | 6            | 20          | 28        |
|                                                                       | <b>SF</b> | 6            | 139         | 100       | 6            | 144         | 65        |
|                                                                       | <b>D</b>  | 6            | 39          | 31        | 6            | 111         | 61        |
|                                                                       | <b>DF</b> | 9            | 226         | 190       | 7            | 186         | 115       |

**Table S9. Raw data for Lymphocytes from mouse air pouch model for following injection of phenolic compounds and insulin fibrils in non-diabetic and diabetic mice.** Presented here is the raw data used for **Figure 3D**. MAP treatments include: saline (S), diluent (D), saline + fibril (SF), and diluent + fibril (DF) for 3-days (3D) and 7-days (7D) in non-diabetic and diabetic mice.
